# Supplementary material for: Verification of redox-processes as switching and retention failure mechanisms in Nb:SrTiO3/metal devices
Source: Royal Society of Chemistry journal article supplement (doi:10.1039/c6nr00824k), 2016-01-01
Supplement: c6nr00824k1.pdf [file c6nr00824k1.pdf]

## Nanoscale

### Supplementary Information

#### Verification of redox-processes as switching and retention failure mechanisms in Nb:SrTiO<sub>3</sub>/metal devices

C. Baeumer,<sup>a</sup> N. Raab,<sup>a</sup> T. Menke,<sup>a</sup> C. Schmitz,<sup>a</sup> R. Rosezin,<sup>a</sup> P. Müller,<sup>a</sup> M. Andrä,<sup>a</sup> V. Feyer,<sup>a</sup> R. Bruchhaus,<sup>b</sup> F. Gunkel<sup>a,c</sup>, C.M. Schneider,<sup>a</sup> R. Waser<sup>a,c</sup> and R. Dittmann<sup>a</sup>

#### Supplementary Figures

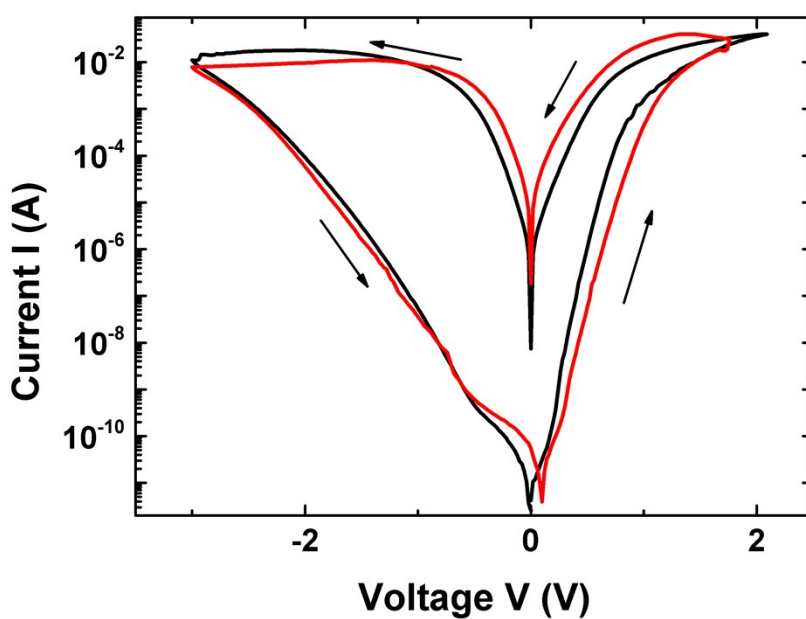

**Supplementary Fig. 1:** *I-V*-characteristic of Pt/Nb:SrTiO<sub>3</sub> junctions and Au/Nb:SrTiO<sub>3</sub> junctions (black and red lines, respectively).

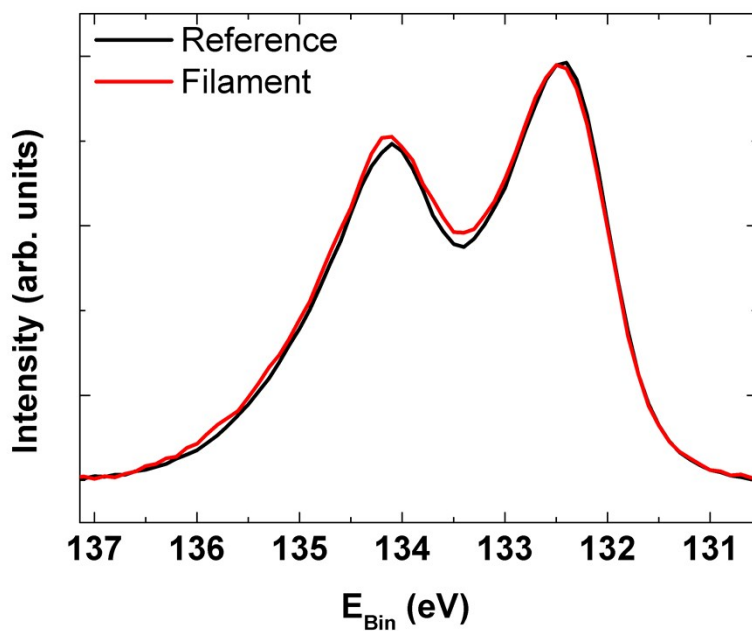

**Supplementary Fig. 2:** Sr 3d spectra for the filament and the surrounding (red and black line, respectively) for the device switched back to the HRS shown in Fig. 4e and f of the main text.

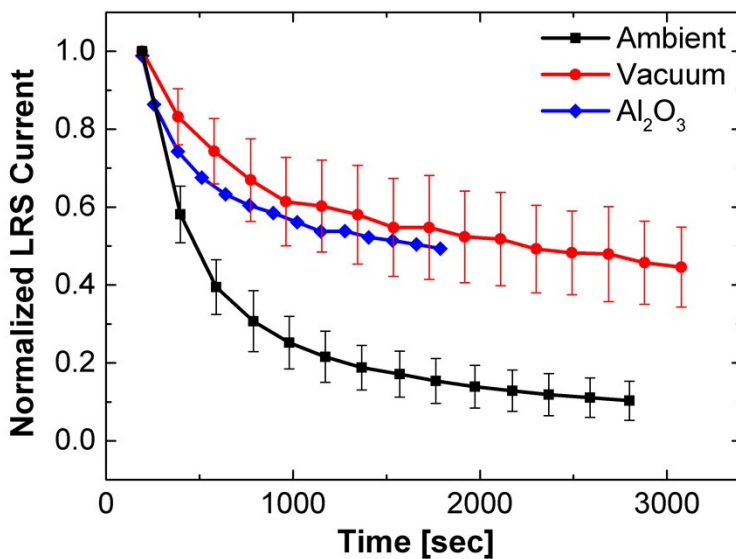

**Supplementary Fig. 3:** Retention measurement of the LRS (low current limit  $\rightarrow$  homogeneous switching) under ambient and vacuum conditions (black and red symbols, respectively). The retention times can also be improved through the insertion of a thin Al<sub>2</sub>O<sub>3</sub> layer (blue symbols).
